# Supplementary material for: Evaluating the oxysterol combination of 22(S)-hydroxycholesterol and 20(S)-hydroxycholesterol in periodontal regeneration using periodontal ligament stem cells and alveolar bone healing models
Source: PubMed Central journal article supplement (PMC5717822; doi:10.1186/s13287-017-0725-9), 2017-12-06

**A**

**Control**

**BMP-2**

**SS**

**10 days**

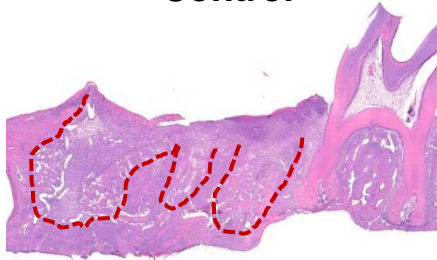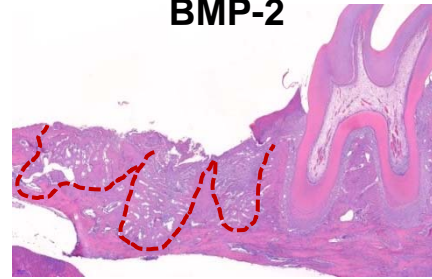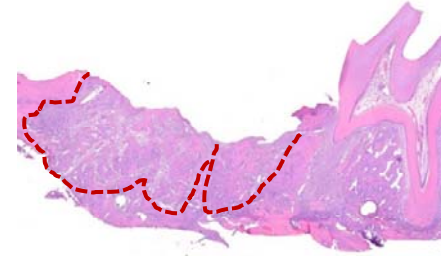

**15 days**

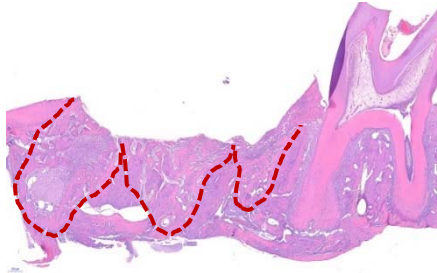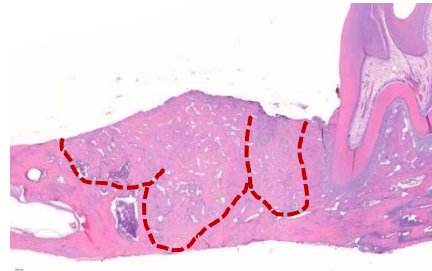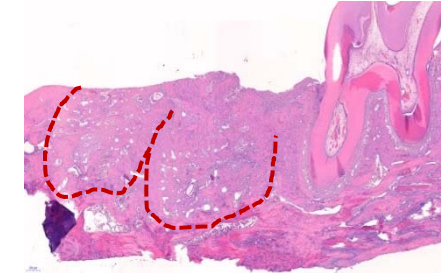

**B**

**OCN**

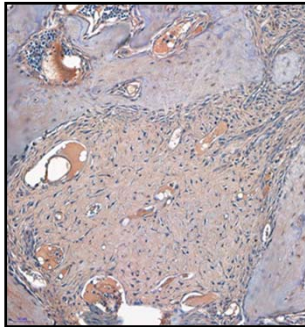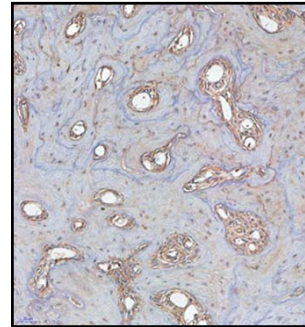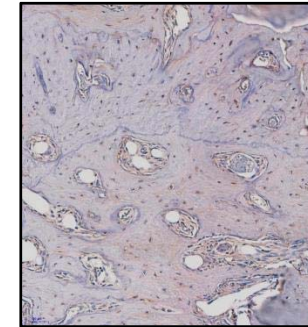

**ALP**

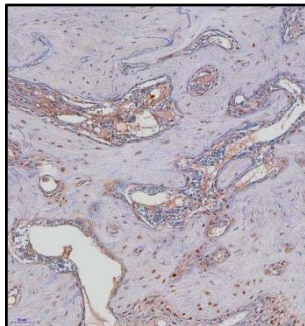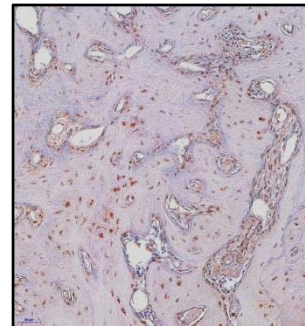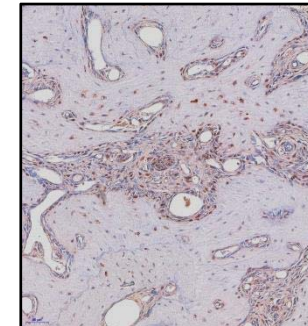

Supplement: 13287_2017_725_MOESM1_ESM.pdf [file 13287_2017_725_MOESM1_ESM.pdf]
